# Supplementary material for: Low temperature synthesis of phosphorous and nitrogen co-doped yellow fluorescent carbon dots for sensing and bioimaging
Source: Royal Society of Chemistry journal article supplement (doi:10.1039/c5tb00575b), 2015-01-01
Supplement: c5tb00575b1.pdf [file c5tb00575b1.pdf]

## Electronic Supplementary Information

### Low temperature synthesis of phosphorous and nitrogen co-doped yellow fluorescent carbon dots for sensors and bioimaging

XiaojuanGong,<sup>‡a</sup> WenjingLu,<sup>‡a</sup> Yang Liu,<sup>a</sup> Zengbo Li,<sup>a</sup> ShaominShuang,<sup>a</sup> Chuan Dong<sup>a\*</sup> and Martin M.F. Choi<sup>b1\*\*</sup>

<sup>a</sup>*Institute of Environmental Science, and School of Chemistry and Chemical Engineering, Shanxi University, Taiyuan 030006, China. Fax: +86-351-7018613; Tel: +86-351-7018613; E-mail: dc@sxu.edu.cn*

<sup>b</sup>*Partner State Key Laboratory of Environmental and Biological Analysis, and Department of Chemistry, Hong Kong Baptist University, 224 Waterloo Road, Kowloon Tong, Hong Kong SAR, China. Fax: +852-34117348; E-mail: mmfchoi@gmail.com*

<sup>‡</sup>*These authors contributed equally to this work.*

<sup>1</sup>*Present address: Acadia Divinity College, Acadia University, 15 University Avenue, Wolfville, Nova Scotia, B4P 2R6, Canada.*

#### Measurement of quantum yield ( $\Phi_s$ )

The  $\Phi_s$  of the P,N-CD were determined by a comparative method as follows:

$$\Phi_s = \Phi_R (\text{Grad}_S / \text{Grad}_R) (\eta^2_S / \eta^2_R) \quad (1)$$

where Grad is the gradient from the plot of integrated fluorescence intensity against absorbance and  $\eta(1.333)$  is the refractive index of the solvent. The subscripts S and R represent P,N-CD and the reference (quinine sulfate in 0.10 M H<sub>2</sub>SO<sub>4</sub>). To prevent the re-absorption effect, the absorbances of P,N-CD and quinine sulfate solutions in the 10-mm fluorescence cuvette were adjusted to less than 0.10 at the excitation wavelength ( $\lambda_{\text{ex}}$ ) of 380 nm (*i.e.*, the moderate excitation wavelength of P,N-CD and quinine sulfate). The integrated fluorescence intensity was the area under the PL curve in the wavelength range 460–720 nm. The  $\Phi_R$  was taken as 0.54 since it is almost independent (within 5%) with  $\lambda_{\text{ex}}$  at 200–400 nm.<sup>1,2</sup>

#### Reference

- [1] X. Wang, K. Qu, B. Xu, J. Ren and X. Qu, *J. Mater. Chem.*, 2011, **21**, 2445.
- [2] Y. Fang, S. Guo, D. Li, C. Zhu, W. Ren, S. Dong and E. Wang, *ACS Nano*, 2012, **6**, 400.

**Table S1.** Elemental analysis of the as-synthesised P,N-CD: (A) elemental content and (B) relative number of atom in P,N-CD.

| (A)         |                       |      |      |       |                |
|-------------|-----------------------|------|------|-------|----------------|
| Sample name | Elemental content (%) |      |      |       |                |
|             | C                     | H    | N    | P     | O (Calculated) |
| P,N-CD      | 8.62                  | 2.72 | 1.56 | 21.60 | 65.50          |

  

| (B)         |                         |    |   |    |    |                               |
|-------------|-------------------------|----|---|----|----|-------------------------------|
| Sample name | Relative number of atom |    |   |    |    | Empirical formula             |
|             | C                       | H  | N | P  | O  |                               |
| P,N-CD      | 13                      | 49 | 2 | 13 | 74 | $C_{13}H_{49}N_2P_{13}O_{74}$ |

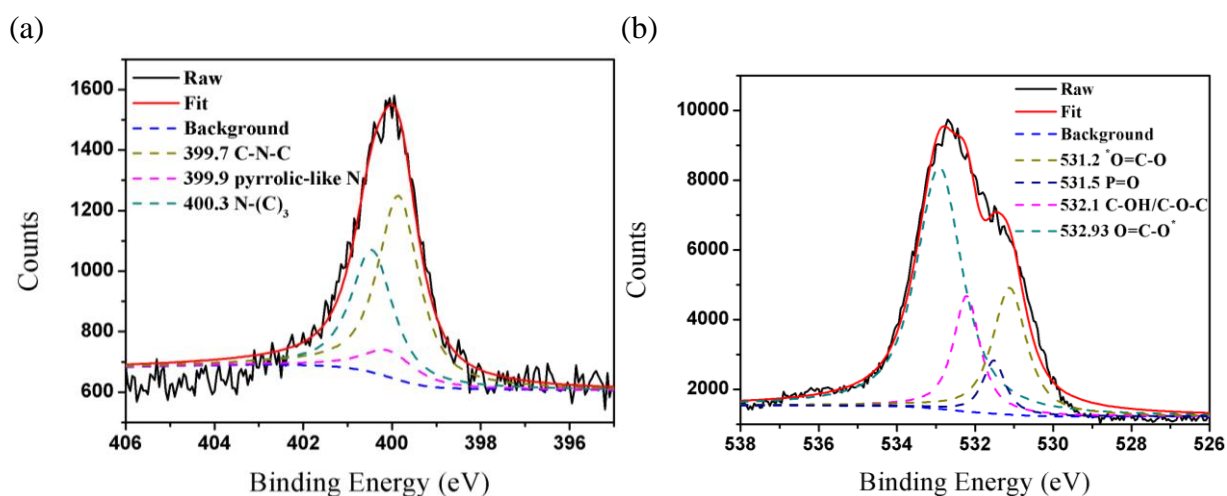

**Fig. S1.** (a) N1s XPS and (b) O1s XPS of P,N-CD.

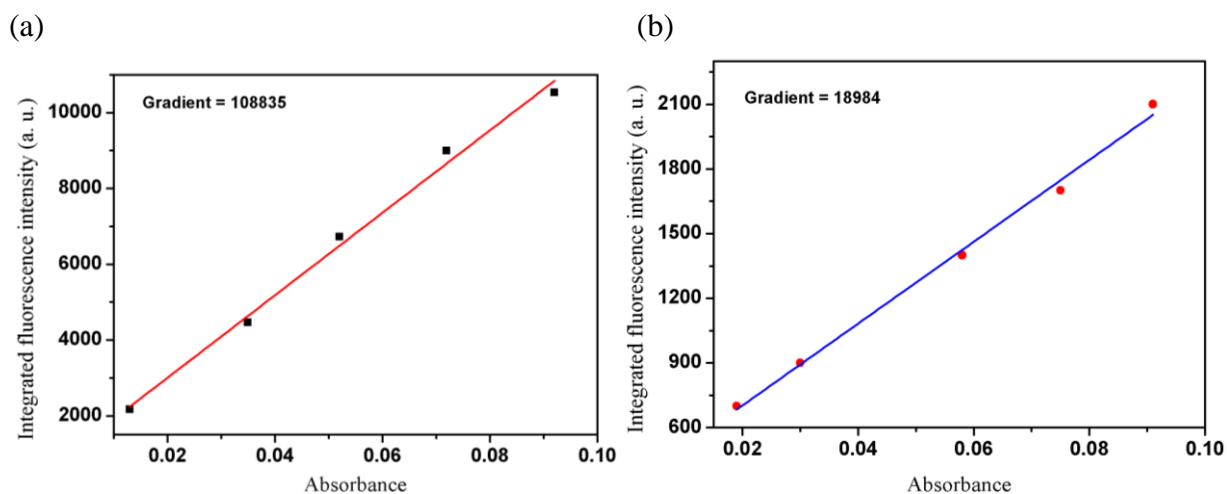

**Fig. S2.** Plots of integrated PL intensity against absorbance of (a) quinine sulfate and (b) P,N-CD at  $\lambda_{ex}$  of 380 nm.

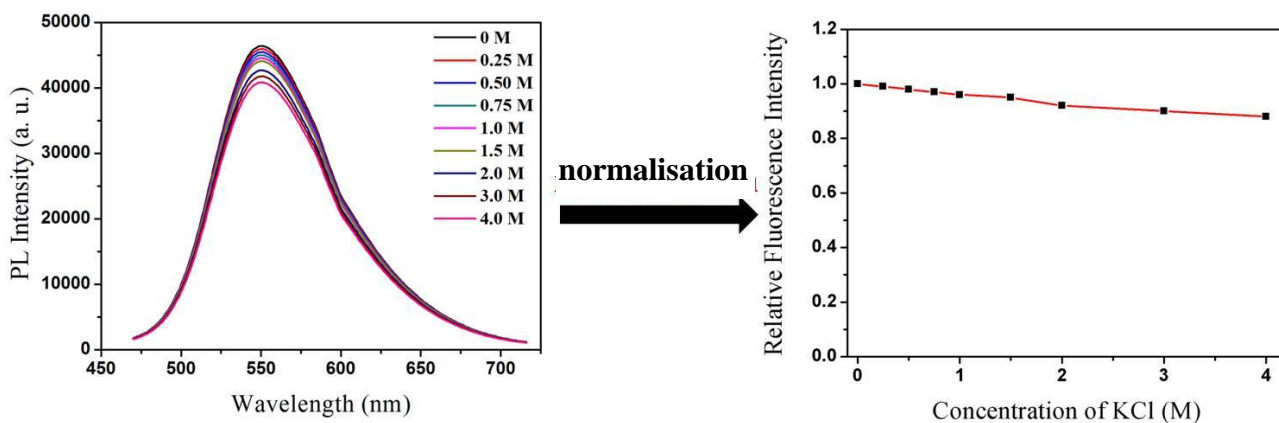

**Fig. S3.** Effect of ionic strength on fluorescence intensity of P,N-CD. The ionic strength is controlled by KCl.

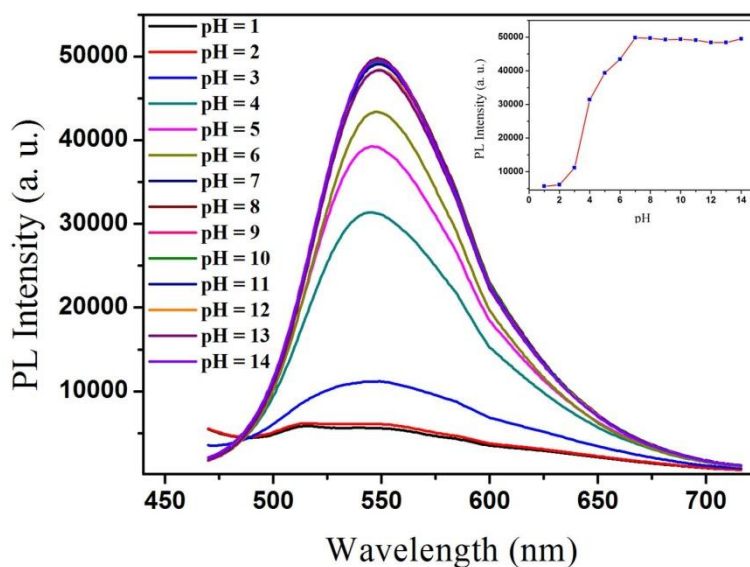

**Fig. S4.** The PL spectra of P,N-CD at different pHs (1.0–14). The inset displays the PL intensity of P,N-CD against pH at  $\lambda_{\text{ex}}/\lambda_{\text{em}}$  of 425/550 nm.

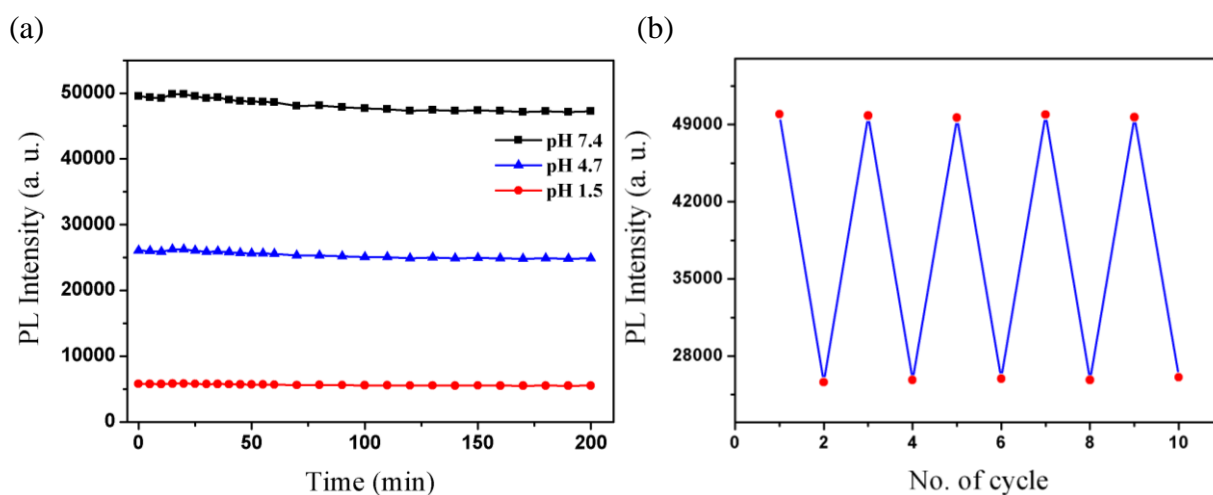

**Fig. S5.** (a) Changes in fluorescence intensity of P,N-CD with time at pH 7.4, 4.7 and 1.5. Excitation and emission bandwidths are both set at 2 nm. (b) Changes in the PL intensity of P,N-CD cycled between pH 7.4 and 4.7.  $\lambda_{\text{ex}}/\lambda_{\text{em}}$  are 425/550 nm.

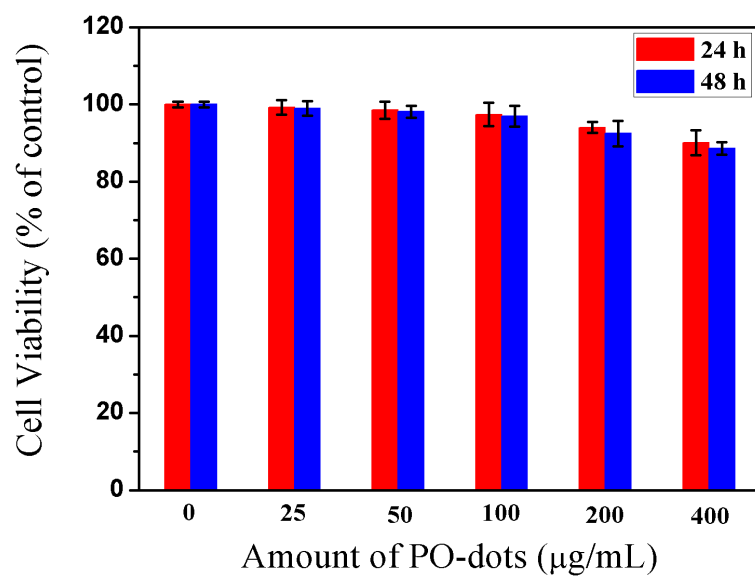

**Fig. S6.** Cytotoxicity test of P,N-CD on MCF-7 cells viability. The values represent percentage cell viability (mean%  $\pm$  SD,  $n=6$ ).

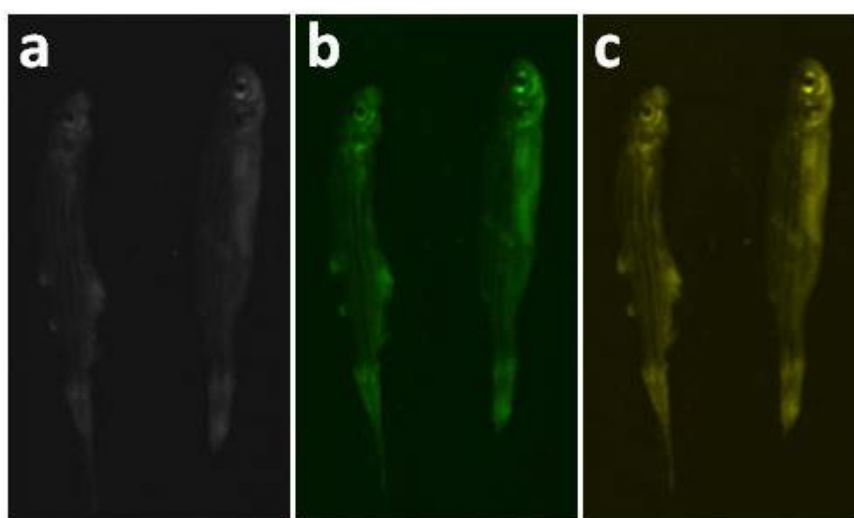

**Fig. S7.** *In vivo* zebrafish imaging of P,N-CD under (a) bright field, (b)  $\lambda_{ex}/\lambda_{em}$  of 435/525 nm, and (c) 470/570 nm for 60 min (left) and 120 min (right).

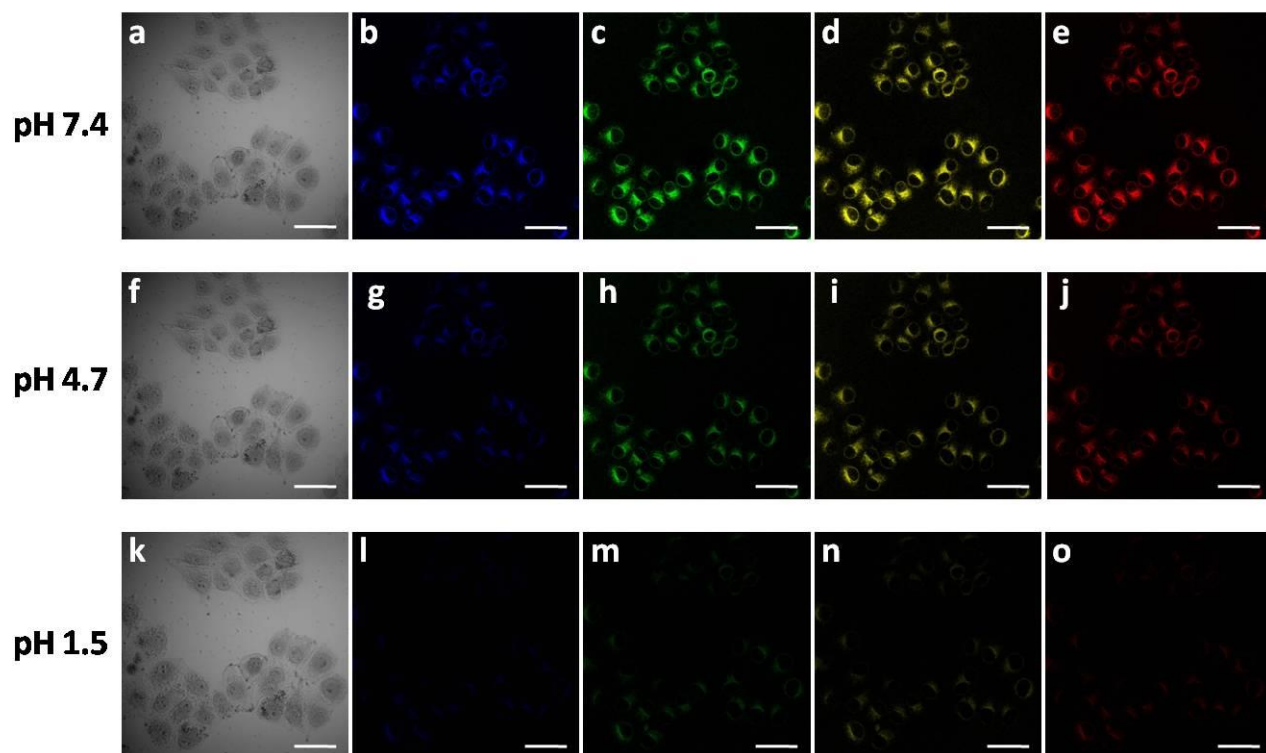

**Fig. S8.** Confocal fluorescence imaging of MCF-7 cells incubated with 0.40 mg/mL P,N-CD for 60 min at pH 7.4, 4.7 and 1.5. (a), (f) and (k) show the bright field images of MCF-7 cells. (b), (g) and (i), (c), (h) and (m), (d), (i) and (n), and (e), (j) and (o) are cell images taken at  $\lambda_{\text{ex}}/\lambda_{\text{em}}$  of  $405/422 \pm 25$ ,  $488/500 \pm 25$ ,  $515/570 \pm 25$  and  $543/650 \pm 25$  nm, respectively. Scale bar, 50  $\mu\text{m}$ .
